# Supplementary material
Source: PubMed Central journal article supplement (PMC5087002)
Supplement: pnas.1607973113.sapp.pdf [file pnas.1607973113.sapp.pdf]

## **Supplementary Information**

### **Microbial-type terpene synthase genes occur widely in nonseed land plants, but not in seed plants**

Qidong Jia, Guanglin Li, Tobias G. Köllner, Jianyu Fu, Xinlu Chen, Wangdan Xiong, Barbara Crandall-Stotler, John L. Bowman, David J. Weston, Yong Zhang, Li Chen, Yinlong Xie, Fay-Wei Li, Carl J Rothfels, Anders Larsson, Sean W. Graham, Dennis W. Stevenson, Gane Ka-Shu Wong, Jonathan Gershenzon, and Feng Chen

#### **Materials and Methods**

##### **Identification of terpene synthases of the microbial type from transcriptomes and sequenced genomes**

The One Thousand Plants Project (OneKP; <https://sites.google.com/a/ualberta.ca/onekp/>) has sequenced transcriptomes for over 1000 non-model plant species spanning almost all major plant clades (from green algae to flowering plants) (1). All transcriptomes were pre-assembled with the SOAPdenovo-Trans (2) assembler. Transcriptomes of 1103 representative species (Table S1) were analyzed in this study. For all the assembled contigs, the longest regions without stop codons were annotated and translated using the getorf program from the EMBOSS package (3) with a minimum length of 150 amino acids. The resulting peptides were searched against the Pfam-A database locally using HMMER 3.0 hmmsearch (4) with an E-value of  $1e^{-5}$ . Only sequences with best hits from the following four HMM profiles were considered as putative terpene synthases:

Terpene\_synth\_C (PF03936) and Terpene synthase N-terminal domain (PF01397), TRI5 (PF06330) and SmMTPSLs (a profile created by using 48 microbial type TPSs identified from *S. moellendorffii*). For sequences from the same species that had 100% identity, only the longest one was retained, to reduce redundancy. All the putative TPS sequences were subjected to a BLASTP search against the NCBI's non-redundant database using default parameters. A TPS was annotated as “Microbial TPS-like protein” (MTPSL) if all the top ten best hits were from bacteria and/or fungi or identical/highly similar to SmMTPSLs.

## **Assembly of hornwort *Anthoceros punctatus* genome and identification of *MTPSL* genes**

For *Anthoceros punctatus*, the Illumina paired-end whole genome sequencing data (access number: SRR1278954) (5) were retrieved from NCBI's Sequence Read Archive (SRA) database. The reads were assembled using SPAdes-3.1.1 (6) and the resulting contigs and singletons were further assembled by CAP3 (7). The final CAP3 assembly contains 34448 sequences (16272 contigs and 18176 singletons) a total length of 97Mb, of which 15596 sequences have a minimum length of 500 bp. The N50 contig length based on these 15596 sequences is 12,462 bp. The assemblies were searched for occurrences of terpene synthases using homology-based methods and *ab initio* predictors. A TBLASTN search was performed with an E-value cutoff of  $1e^{-30}$  using the 716 *MTPSL* genes identified from OneKP transcriptomes. We also ran SNAP (8) trained for *Arabidopsis thaliana* on the assembly. The resulting protein sequences of predicted genes were subsequently subjected to a HMMER search against four HMM profiles (PF03936, PF01397, PF06330 and SmMTPSLs generated by using 48 microbial type TPSs from *S. moellendorffii*).

### **Phylogenetic analyses of terpene synthases.**

Bacterial and fungal terpene synthases were obtained from Pfam (version 27.0). Considering that certain MTPSLs from plants may contain a transit peptide that is absent in bacterial and fungal TPSs and certain fungal TPSs contain an extended N-terminal domain, to reduce ambiguities in sequence alignment, only the terpene synthase C terminal domains were included. Sequences were aligned using MAFFT (linsi) (9) with 1000 iterations of improvement. ProtTest (10) was used to select the most appropriate protein evolution model for the protein alignment under the Akaike Information Criterion. For the maximum likelihood analyses, we used RAxML (11) with 1000 bootstrap replicates under the best substitution model (LG+G+F) selected by ProtTest.

### **Plant material, genomic DNA isolation and PCR**

*Scapania nemorea*, *Anthoceros punctatus* and *Sphagnum fallax* were cultured axenically in Hatcher's medium (12), Knop medium (13) and BCD medium (14), respectively.

Genomic DNA from each species was isolated using the VIOGENE plant genomic DNA isolation kit (Viogene BioTek Corp., Taiwan) and used for PCR with primers listed in Table S9. PCR products were cloned into the pGEM®-T Easy Vector (Promega, USA) and fully sequenced.

### **Reagents**

(*E*)-GPP, (*E,E*)-FPP, (*Z,Z*)-FPP and (*E,E,E*)-GGPP were purchased from Echelon Biosciences (Salt Lake City). (*Z,E*)-FPP was kindly provided by Nathalie Gatto and Wilhelm Boland from Max Planck Institute for Chemical Ecology, Jena, Germany. [1-<sup>3</sup>H](*E,E*)-FPP was a product of American Radiolabeled Chemicals (St. Louis).

### **Terpene synthase enzyme assays and kinetic measurements**

Representative members from each of the four groups of *MTPSL* genes were selected for gene synthesis. The synthesized cDNAs were cloned into a protein expression vector pEXP5/CT-TOPO (Thermo Fisher Scientific, USA). Protein expression in *E. coli* and terpene synthase enzyme assays were performed as previously described (15). To determine the kinetic properties of Mon-UJTT-MTPSL4, its cDNA was first amplified via PCR using a pair of primers listed in Table S9. The PCR product was cloned into pET32a, in which the Mon-UJTT-MTPSL4 coding sequence was fused to the his-tag coding sequence at its N-terminal. *E. coli*-expressed recombinant Mon-UJTT-MTPSL4 was purified through the his-tag using the HisTrap HP column (GE Lifesciences, USA). The purified Mon-UJTT-MTPSL4 was used for kinetic measurements using [1-<sup>3</sup>H](*E,E*)-FPP as substrate via a radiochemical method as previously described (16).

## References

1. Matasci N, *et al.* (2014) Data access for the 1,000 Plants (1KP) project. *Gigascience* **3**:17.
2. Xie Y, *et al.* (2014) SOAPdenovo-Trans: de novo transcriptome assembly with short RNA-Seq reads. *Bioinformatics* **30**(12):1660-1666.
3. Rice P, Longden I, Bleasby A (2000) EMBOSS: the European Molecular Biology Open Software Suite. *Trends Genet* **16**(6):276-277.
4. Finn RD, Clements J, Eddy SR (2011) HMMER web server: interactive sequence similarity searching. *Nucleic Acids Res* **39**(Web Server issue):W29-37.
5. Li FW, *et al.* (2014) Horizontal transfer of an adaptive chimeric photoreceptor from bryophytes to ferns. *Proc Natl Acad Sci U S A* **111**(18):6672-6677.
6. Bankevich A, *et al.* (2012) SPAdes: a new genome assembly algorithm and its applications to single-cell sequencing. *J Comput Biol* **19**(5):455-477.
7. Huang X, Madan A (1999) CAP3: A DNA sequence assembly program. *Genome Res* **9**(9):868-877.
8. Korf I (2004) Gene finding in novel genomes. *BMC Bioinformatics* **5**:59.
9. Katoh K, Misawa K, Kuma K, Miyata T (2002) MAFFT: a novel method for rapid multiple sequence alignment based on fast Fourier transform. *Nucleic Acids Res* **30**(14):3059-3066.
10. Darriba D, Taboada GL, Doallo R, Posada D (2011) ProtTest 3: fast selection of best-fit models of protein evolution. *Bioinformatics* **27**(8):1164-1165.
11. Stamatakis A (2014) RAxML version 8: a tool for phylogenetic analysis and post-analysis of large phylogenies. *Bioinformatics* **30**(9):1312-1313.
12. Hatcher RE (1965) Towards the establishment of a pure culture collection of hepaticae. *The Bryologist* **68**(2):227-231.
13. Reski R, Abel WO (1985) Induction of budding on chloronemata and caulonemata of the moss, *Physcomitrella patens*, using isopentenyladenine. *Planta* **165**(3):354-358.
14. Ashton NW, Cove DJ (1977) The isolation and preliminary characterisation of auxotrophic and analogue resistant mutants of the moss, *Physcomitrella patens*. *Mol Gen Genet* **154**(1):87-95.
15. Li G, *et al.* (2012) Nonseed plant *Selaginella moellendorffii* has both seed plant and microbial types of terpene synthases. *Proc Natl Acad Sci USA* **109**(36):14711-14715.
16. Tholl D, Chen F, Petri J, Gershenzon J, Pichersky E (2005) Two sesquiterpene synthases are responsible for the complex mixture of sesquiterpenes emitted from *Arabidopsis* flowers. *Plant J* **42**(5):757-771.
17. Hanssen HP, Sprecher E, Abraham WR (1986) 6-Protoilludene, the major molatile metabolite from *ceratocystis piceae* liquid cultures. *Phytochemistry* **25**(8):1979-1980.





**Table S2. Summary statistics of *MTPSLs* in 9 plant lineages.**

| Lineage      | Species Count | MTPSL Count | Mean | Median | St. Dev. | Min | Max |
|--------------|---------------|-------------|------|--------|----------|-----|-----|
| Angiosperms  | 699           | 5           | 0.01 | 0      | 0.16     | 0   | 4   |
| Gymnosperms  | 80            | 0           | 0    | 0      | 0        | 0   | 0   |
| Monilophytes | 70            | 353         | 5.04 | 4.50   | 3.81     | 0   | 20  |
| Lycophytes   | 22            | 83          | 3.77 | 3      | 2.65     | 0   | 10  |
| Hornworts    | 7             | 14          | 2    | 0      | 3.32     | 0   | 9   |
| Mosses       | 41            | 79          | 1.93 | 1      | 1.82     | 0   | 7   |
| Liverworts   | 26            | 177         | 6.81 | 8      | 4.15     | 0   | 16  |
| Charophytes  | 47            | 1           | 0.02 | 0      | 0.15     | 0   | 1   |
| Chlorophytes | 111           | 0           | 0    | 0      | 0        | 0   | 0   |

**Table S3. 22 MTPSL genes designated as Unclassified and their top hits from Non redundant (NR) database of NCBI**

| MTPSL_id           | Lineages     | NR_top_hit                      | evaluate | bit_score | Scientific_name                   | Kingdom  |
|--------------------|--------------|---------------------------------|----------|-----------|-----------------------------------|----------|
| (RXRQ_WCZB)_MTPSL7 | Hornworts    | gi 751680917 gb KIM31075.1      | 0        | 1019      | Serendipita vermifera MAFF 305830 | Fungi    |
| (RXRQ_WCZB)_MTPSL8 | Hornworts    | gi 353240956 emb CCA72799.1     | 0        | 981       | Piriformospora indica DSM 11827   | Fungi    |
| (RXRQ_WCZB)_MTPSL9 | Hornworts    | gi 353240956 emb CCA72799.1     | 7E-130   | 391       | Piriformospora indica DSM 11827   | Fungi    |
| MCHJ_MTPSL1        | Charophytes  | gi 913451420 ref WP_050430829.1 | 0.001    | 50.8      | Chondromyces crocatus             | Bacteria |
| MRKX_MTPSL1        | Angiosperms  | gi 588255974 ref XP_006957163.1 | 0        | 558       | Wallemia mellicola CBS 633.66     | Fungi    |
| QAIR_MTPSL1        | Angiosperms  | gi 751178290 gb KIL64254.1      | 5E-177   | 508       | Amanita muscaria Koide BX008      | Fungi    |
| QAIR_MTPSL2        | Angiosperms  | gi 751175026 gb KIL61028.1      | 0        | 620       | Amanita muscaria Koide BX008      | Fungi    |
| QAIR_MTPSL3        | Angiosperms  | gi 751174784 gb KIL60790.1      | 7E-143   | 427       | Amanita muscaria Koide BX008      | Fungi    |
| QAIR_MTPSL4        | Angiosperms  | gi 751181225 gb KIL67171.1      | 0        | 691       | Amanita muscaria Koide BX008      | Fungi    |
| JKAA_MTPSL1        | Lycophytes   | gi 927407765 ref XP_013949969.1 | 0        | 541       | Trichoderma virens Gv29-8         | Fungi    |
| ZYCD_MTPSL1        | Lycophytes   | gi 238496645 ref XP_002379558.1 | 1E-130   | 390       | Aspergillus flavus NRRL3357       | Fungi    |
| AEXY_MTPSL1        | Liverworts   | gi 389636521 ref XP_003715910.1 | 6E-178   | 513       | Magnaporthe oryzae 70-15          | Fungi    |
| IRBN_MTPSL6        | Liverworts   | gi 751680917 gb KIM31075.1      | 0        | 934       | Serendipita vermifera MAFF 305830 | Fungi    |
| JHFI_MTPSL16       | Liverworts   | gi 751680917 gb KIM31075.1      | 6E-101   | 313       | Serendipita vermifera MAFF 305830 | Fungi    |
| LGOW_MTPSL3        | Liverworts   | gi 629725325 ref XP_007822988.1 | 7E-56    | 196       | Metarhizium robertsii             | Fungi    |
| NWQC_MTPSL8        | Liverworts   | gi 629725325 ref XP_007822988.1 | 6E-36    | 144       | Metarhizium robertsii             | Fungi    |
| OFTV_MTPSL7        | Liverworts   | gi 751680917 gb KIM31075.1      | 0        | 931       | Serendipita vermifera MAFF 305830 | Fungi    |
| RTMU_MTPSL4        | Liverworts   | gi 667838359 ref XP_007783348.1 | 3E-128   | 386       | Coniosporium apollinis CBS 100218 | Fungi    |
| WJLO_MTPSL3        | Liverworts   | gi 549052256 emb CCX30236.1     | 4E-68    | 231       | Pyronema omphalodes CBS 100304    | Fungi    |
| WJLO_MTPSL4        | Liverworts   | gi 549052256 emb CCX30236.1     | 1E-71    | 240       | Pyronema omphalodes CBS 100304    | Fungi    |
| YBQN_MTPSL8        | Liverworts   | gi 648165817 gb KDR79494.1      | 0        | 596       | Galerina marginata CBS 339.88     | Fungi    |
| QIAD_MTPSL2        | Monilophytes | gi 629662947 ref XP_007805277.1 | 2E-77    | 251       | Endocarpon pusillum Z07020        | Fungi    |



**Table S4. Eight MTPSLs identified from the transcriptome of the liverwort *Scapania nemorea***

| <b>Gene</b>            | <b>Group</b>         |
|------------------------|----------------------|
| Liv-IRBN-MTPSL1        | I                    |
| Liv-IRBN-MTPSL2        | I                    |
| Liv-IRBN-MTPSL3        | I                    |
| Liv-IRBN-MTPSL4        | I                    |
| Liv-IRBN-MTPSL5        | I                    |
| <b>Liv-IRBN-MTPSL6</b> | <b>II</b>            |
| Liv-IRBN-MTPSL7        | III                  |
| <b>Liv-IRBN-MTPSL8</b> | <b>U<sup>a</sup></b> |

<sup>a</sup>unclassified

**Table S5. *MTPSL* genes from the genome of the hornwort *Anthoceros punctatus***

| <b>Gene</b> | <b>Protein</b> | <b>Group</b> |
|-------------|----------------|--------------|
| ApMTPSL1    | 408            | II           |
| ApMTPSL2    | 430            | III          |
| ApMTPSL3    | 436            | II           |
| ApMTPSL4    | 401            | III          |
| ApMTPSL5    | 413            | III          |
| ApMTPSL6    | 421            | III          |
| ApMTPSL7    | 427            | III          |

**Table S6. *MTPSL* genes from the genome of the moss *Sphagnum fallax***

| <b>Gene</b> | <b>Protein size</b> | <b>Group</b> |
|-------------|---------------------|--------------|
| SfMTPSL1    | 472                 |              |
| SfMTPSL2    | 341                 |              |
| SfMTPSL3    | 328                 |              |
| SfMTPSL4    | 482                 |              |
| SfMTPSL5    | 489                 |              |
| SfMTPSL6    | 477                 |              |
| SfMTPSL7    | 481                 |              |
| SfMTPSL8    | 484                 |              |
| SfMTPSL9    | 377                 |              |
| SfMTPSL10   | 481                 |              |
| SfMTPSL11   | 440                 |              |
| SfMTPSL12   | 487                 |              |
| SfMTPSL13   | 455                 |              |
| SfMTPSL14   | 456                 |              |
| SfMTPSL15   | 472                 |              |
| SfMTPSL16   | 472                 |              |
| SfMTPSL17   | 341                 |              |
| SfMTPSL18   | 457                 |              |
| SfMTPSL19   | 453                 |              |
| SfMTPSL20   | 455                 |              |
| SfMTPSL21   | 455                 |              |

**Table S7. A list of sequenced genomes searched for *MTPSL* genes**

| Species                               | Data version  |
|---------------------------------------|---------------|
| <i>Amaranthus hypochondriacus</i>     | v1.0          |
| <i>Amborella trichopoda</i>           | v1.0          |
| <i>Ananas comosus</i>                 | v3            |
| <i>Aquilegia coerulea</i>             | v1.1          |
| <i>Aquilegia coerulea</i>             | v3.1          |
| <i>Arabidopsis halleri</i>            | v1.1          |
| <i>Arabidopsis lyrata</i>             | v1.0          |
| <i>Arabidopsis thaliana</i>           | TAIR10        |
| <i>Boechera stricta</i>               | v1.2          |
| <i>Brachypodium distachyon</i>        | v3.1          |
| <i>Brachypodium stacei</i>            | v1.1          |
| <i>Brassica rapa</i>                  | FPsc v1.3     |
| <i>Capsella grandiflora</i>           | v1.1          |
| <i>Capsella rubella</i>               | v1.0          |
| <i>Carica papaya</i>                  | ASGPBv0.4     |
| <i>Chlamydomonas reinhardtii</i>      | v5.5          |
| <i>Citrus clementina</i>              | v1.0          |
| <i>Citrus sinensis</i>                | v1.1          |
| <i>Coccomyxa subellipsoidea C-169</i> | v2.0          |
| <i>Cucumis sativus</i>                | v1.0          |
| <i>Eucalyptus grandis</i>             | v2.0          |
| <i>Eutrema salsugineum</i>            | v1.0          |
| <i>Fragaria vesca</i>                 | v1.1          |
| <i>Glycine max</i>                    | Wm82.a2.v1    |
| <i>Gossypium raimondii</i>            | v2.1          |
| <i>Kalanchoe marnieriana</i>          | v1.1          |
| <i>Klebsormidium flaccidum</i>        | v1.0          |
| <i>Linum usitatissimum</i>            | v1.0          |
| <i>Malus domestica</i>                | v1.0          |
| <i>Manihot esculenta</i>              | v6.1          |
| <i>Medicago truncatula</i>            | Mt4.0v1       |
| <i>Micromonas pusilla CCMP1545</i>    | v3.0          |
| <i>Micromonas</i> sp. RCC299          | v3.0          |
| <i>Mimulus guttatus</i>               | v2.0          |
| <i>Musa acuminata</i>                 | v1            |
| <i>Oryza sativa</i>                   | v7_JGI        |
| <i>Ostreococcus lucimarinus</i>       | v2.0          |
| <i>Panicum hallii</i>                 | v2.0          |
| <i>Panicum virgatum</i>               | v1.1          |
| <i>Phaseolus vulgaris</i>             | v1.0          |
| <i>Physcomitrella patens</i>          | v3.3          |
| <i>Populus trichocarpa</i>            | v3.0          |
| <i>Prunus persica</i>                 | v2.1          |
| <i>Ricinus communis</i>               | v0.1          |
| <i>Salix purpurea</i>                 | v1.0          |
| <i>Selaginella moellendorffii</i>     | v1.0          |
| <i>Setaria italica</i>                | v2.2          |
| <i>Setaria viridis</i>                | v1.1          |
| <i>Solanum lycopersicum</i>           | iTAG2.3       |
| <i>Solanum tuberosum</i>              | v3.4          |
| <i>Sorghum bicolor</i>                | v3.1          |
| <i>Sphagnum fallax</i>                | v0.5          |
| <i>Spirodela polyrhiza</i>            | v2            |
| <i>Theobroma cacao</i>                | v1.1          |
| <i>Triticum aestivum</i>              | v2.2          |
| <i>Vitis vinifera</i>                 | Genoscope.12X |
| <i>Volvox carteri</i>                 | v2.1          |
| <i>Zea mays</i>                       | 6a            |
| <i>Zostera marina</i>                 | v2.2          |

**Table S8. A list of representative *MTPSL* genes experimentally studied.**

| <b>Sequence ID</b> | <b>Lineage</b> | <b>Species</b>                   | <b>Group</b> |
|--------------------|----------------|----------------------------------|--------------|
| Liv-IRBN-MTPSL2    | Liverworts     | <i>Scapania nemorea</i>          | I            |
| Liv-IRBN-MTPSL4    | Liverworts     | <i>Scapania nemorea</i>          | I            |
| Mos-GOWD-MTPSL2    | Mosses         | <i>Sphagnum lescurii</i>         | I            |
| Mos-QKQO-MTPSL3    | Mosses         | <i>Pseudotaxiphyllum elegans</i> | II           |
| Mos-VBMM-MTPSL3    | Mosses         | <i>Anomodon rostratus</i>        | II           |
| Hon-ApMTPSL7       | Hornworts      | <i>Anthoceros punctatus</i>      | III          |
| Mon-GSXD-MTPSL3    | Monilophytes   | <i>Myriopteris eatonii</i>       | IV           |
| Mon-UJTT-MTPSL4    | Monilophytes   | <i>Pityrogramma trifoliata</i>   | IV           |
| Mon-YJJY-MTPSL1    | Monilophytes   | <i>Woodsia scopulina</i>         | IV           |

**Table S9. Primers used in this study**

| <b>Region amplified</b>              | <b>Primer</b> | <b>DNA sequences</b>                   |
|--------------------------------------|---------------|----------------------------------------|
| ApMTPSL1 and its<br>neighboring gene | Forward       | 5'-CACTACTGCGTCGGCTTCATG-3'            |
|                                      | Reverse       | 5'-CGCACAGCATTCAACAATTCACCT-3'         |
| ApMTPSL2 and its<br>neighboring gene | Forward       | 5'-CAGGTAGGAGCCCCGCGATTT-3'            |
|                                      | Reverse       | 5'-AGGGAAAAGGAGGGTGGTG-3'              |
| SfMTPSL1 and its<br>neighboring gene | Forward       | 5'-CAGAAGCAAAGTATCGGTCTCTTAC -3'       |
|                                      | Reverse       | 5'-CACTGTTAGCAGGGTATGGTGAAC-3'         |
| Liv-IRBN-MTPSL1                      | Forward       | 5'-TTCTGAGGACGAGCGTATTCTTC-3'          |
|                                      | Reverse       | 5'-GCAAAACGTCAACTAAACGAGAAG-3'         |
| Liv-IRBN-MTPSL2                      | Forward       | 5'-TCATACTCGCCTCCATATCCTGTG-3'         |
|                                      | Reverse       | 5'-GATTTGAAATGTCAGTCATGTGTGC-3'        |
| Liv-IRBN-MTPSL3                      | Forward       | 5'-GATGCCAACGCAGCCATACAGAC-3'          |
|                                      | Reverse       | 5'-GCCTGATACCCAGTTTCTGACGG-3'          |
| Liv-IRBN-MTPSL4                      | Forward       | 5'-CAGTATGTGTGAACTCCTCTGGGTC-3'        |
|                                      | Reverse       | 5'-GCACTCCTTTTCTGTACCGACTGG-3'         |
| Liv-IRBN-MTPSL5                      | Forward       | 5'-TCAAAGGCATCACCTGAAGTCTG-3'          |
|                                      | Reverse       | 5'-ATATTATCGGTGTCCAATCCTCC-3'          |
| Liv-IRBN-MTPSL6                      | Forward       | 5'-AATGCTTGGTGTGTGTTTCGTCTC-3'         |
|                                      | Reverse       | 5'-CCTCCATGTGATTTTCGCAAAGTAG-3'        |
| Liv-IRBN-MTPSL7                      | Forward       | 5'-CTGGCAGATGATTTAGATGAGATAGC-3'       |
|                                      | Reverse       | 5'-CAGAAACAACCCGCAAACCATTC-3'          |
| Liv-IRBN-MTPSL8                      | Forward       | 5'-TCTCCCTGTTGCCACTGCTTTCC-3'          |
|                                      | Reverse       | 5'-GTTGGTCCTGGTACGGCGACTGA-3'          |
| Mon-UJTT-MTPSL4-pET32a               | Forward       | 5'-CATGCCATGGCATCCATTATATTAGGAAGCTC-3' |
|                                      | Reverse       | 5'-CCCAAGCTTAGTTAAAGGCCATCATGACAC-3'   |

```

*           20           *           40           *           60
Liv-IRBN-MTPSL8 : MA--SPATIRLPDILSAMDRFELRTHPDEREVTRASNEWFNSYNMMPAPIFEKFKCDFG : 58
gi|751680917   : MASPSPATIRLPDILSAMDKFELRTHPDEREVTRASNEWFNSYNMMPAPIFEKFKCEFG : 60
MA SPATIRLPDILSAM4FELRTHPDEREVTRASNEWFNSYNMMPAPIFEKFKVFC FG

*           80           *           100          *           120
Liv-IRBN-MTPSL8 : LMTAMSYPDTDATRLRITADYMSILFAYDDLMDLPSSDLMHDRIASSKAAKIMMQVLTHP : 118
gi|751680917   : LMTAMSYPDTDATRLRITADYMSILFAYDDLMDLPSSDLMHDRIASSKAAKIMMQVLTHP : 120
LMTAMSYPDTDATRLRITADYMSILFAYDDLMDLPSSDLMHDRIASSKAAKIMMQVLTHP

*           140          *           160          *           180
Liv-IRBN-MTPSL8 : HKFKPVPGLPVATAFHDFWTRFCATSTPSMQKRFTETTYEYVMAVKNQVGNRASSVCPSI : 178
gi|751680917   : HKFKPVPGLPVATAFHDFWTRFCATSTKSMQKRFTETTYEYVMAVKNQVGNRQSSVCPSI : 180
HKFKPVPGLPVATAFHDFWTRFCATST SMQKRFTETTYEYVMAVKNQVGNR SSVCPSSI

*           200          *           220          *           240
Liv-IRBN-MTPSL8 : EEYVSLRRDTSIAKVTYACIEYCLNIDCPDEAFYHPSLALQEAGNDILSWANDVYSFDN : 238
gi|751680917   : EEYVSLRRDTSIAKVTYACIEYCLNIDVPDEAFYHPSLALQEAGNDILSWANDVYSFDN : 240
EEYVSLRRDTSIAKVTYACIEYCLNID PDEAFYHPSLALQEAGNDILSWANDVYSFDN

*           260          *           280          *           300
Liv-IRBN-MTPSL8 : EQCSGDCHNLIAVVAINKNITVQAAMEYAMGMIDSAINRFFEECSNVPSFGPDVDPKVQA : 298
gi|751680917   : EQCSGDCHNLIAVVAINKNITVQAAMEYAMGMIDSAIARFFEECANVPSFGPDVDPKVQA : 300
EQCSGDCHNLIAVVAINKNITVQAAMEYAMGMIDSAI RFFEEC NVPSFGPDVDPKVQA

*           320          *           340          *           360
Liv-IRBN-MTPSL8 : YIKGVELYLSGSVFWHLESERYFGPRVKHVKDTLMVELRPLDEGAKPAFDLIYKLP SNLT : 358
gi|751680917   : YIKGVELYLSGSVYVWHLESERYFGPRVKHVKDTLMVELRPLDEGAKPAFNLIYKLP SNLT : 360
YIKGVELYLSGSV5VWHLESERYFGPRVKHVKDTLMVELRPLDEGAKPAF1LIYKLP SNLT

*           380          *           400          *           420
Liv-IRBN-MTPSL8 : SNVLAAVSNRTPTP-PAPVEAAP-AAPSPPPRTTRGTPT-----PAHHAPEIHAPVPIS : 410
gi|751680917   : SNVLAAVTPTTKTPEVPVAAAPTVAAPSPPRCSSNSSTGTVRASPVQH--EIHAPTPIIS : 418
SNVLAAV3 T TP P PV AAP APSPPR 3 3 T P H EIHAP PIS

*           440          *           460          *           480
Liv-IRBN-MTPSL8 : PFNPNFPTVSPVPPPSYEHQRAFAQYMAAQLDEKMRAEQYVYVQAPQYYSAPQSPYQDQ : 470
gi|751680917   : PFNPNFPTSNPNMPPPSYEQQRVFAQFMAAQLDEKMRAEQW-QVPQYYSAPQSPYQDQ : 477
PFNPNFPT P 6PPPSYE QR FAQ5MAAQL KMRAEQ 5 Q PQYYSAPQSPYQ Q

*           500          *           520          *           540
Liv-IRBN-MTPSL8 : QQ---KLRQNSLMEVLLSRPTSELTNILVIASVLMASSPLALVPFVPLLVLVLLFPEAPA : 526
gi|751680917   : QQQQLTKARQNSLMEALLNRPTSELTNILVIASVLMASSPLALIPFVPLLVLVLLYPEAPA : 537
QQ K RQNSLME 6L RPTSELTNILVIASVLMASSPLAL6PFVPLLVLVLL5PEAPA

Liv-IRBN-MTPSL8 : VLLS : 530
gi|751680917   : VLLA : 541
VLL

```

**Fig. S1.** Sequence alignment of IRBN\_MTPSL6 identified from the transcriptome of the liverwort *Scapania nemorea* with its top hit in nr database at NCBI. “gi:751680917” is putative terpene synthase gene identified in the fungus *Serendipita vermifera*. The two sequences are 91% identical.

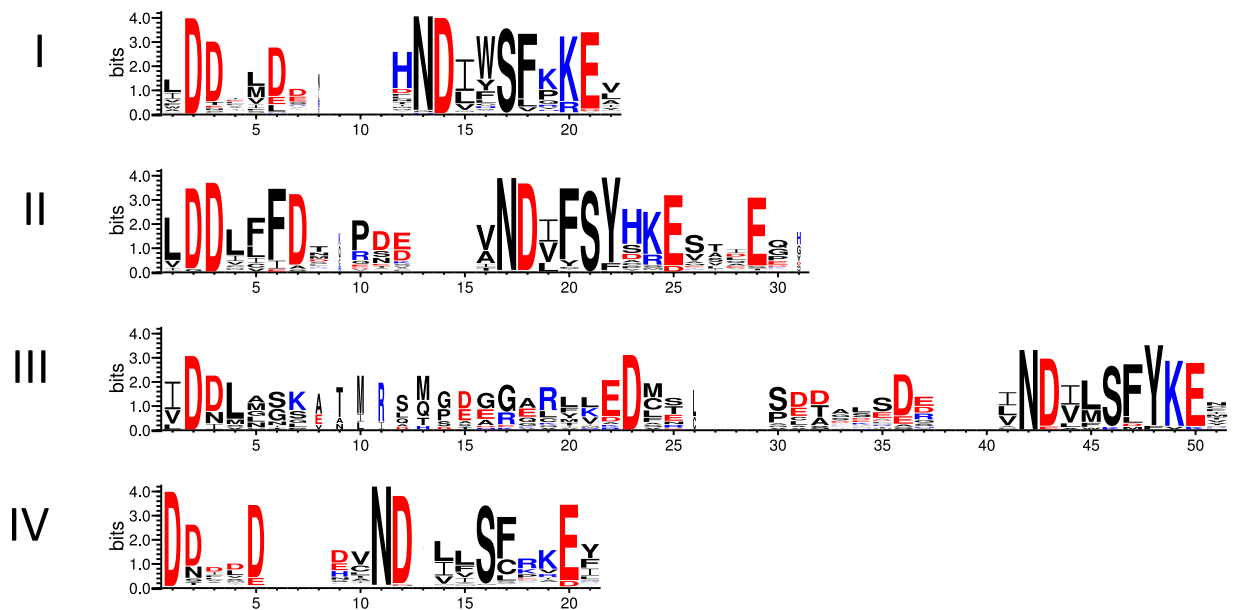

**Fig. S2.** Identification of conserved motifs among the four groups (I, II, III and IV) of microbial type (MTPSL) terpene synthases. The ‘NDxxSxxxD/E’ motif is highly conserved among all MTPSLs. The canonical ‘DDxxD’ motif was present in group I and IV proteins, but group II proteins displayed a conserved ‘DDxxxD’ motif, whereas in the group III enzymes only the first two aspartates (‘DD’) are conserved. Sequence motif logos made using weblogo 3.0, showing the conserved motifs found in each group of terpene synthase genes of microbial type.



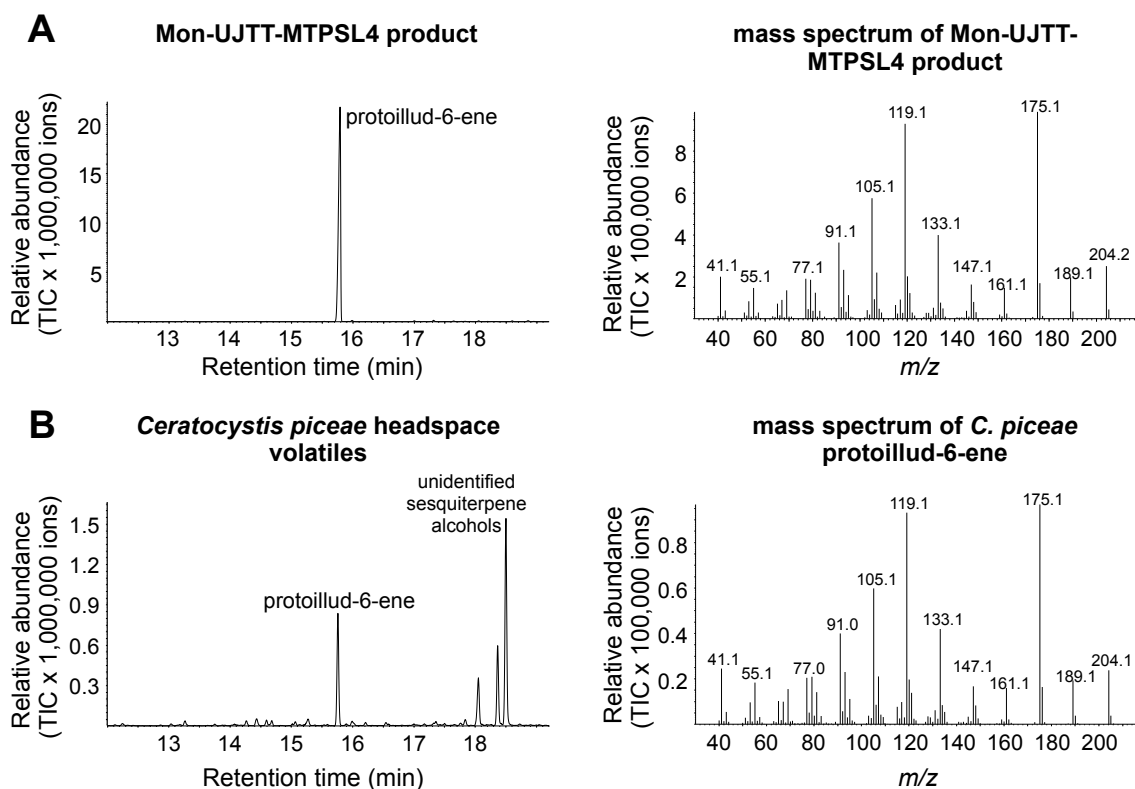

**Fig. S3. Product identification of Mon-UJTT-MTPSL4.** (A) The gene was heterologously expressed in *Escherichia coli* and the crude bacterial protein extract was incubated with FPP. The enzyme product was collected using solid phase micro extraction (SPME) and analyzed with gas chromatography/mass spectrometry (GC-MS). (B) Volatiles from the headspace of a liquid culture of *Ceratocystis piceae* were collected using SPME and analyzed with GC-MS. *C. piceae* has been reported to produce protoillud-6-ene as main sesquiterpene hydrocarbon (17).

## A Monoterpene synthase activity

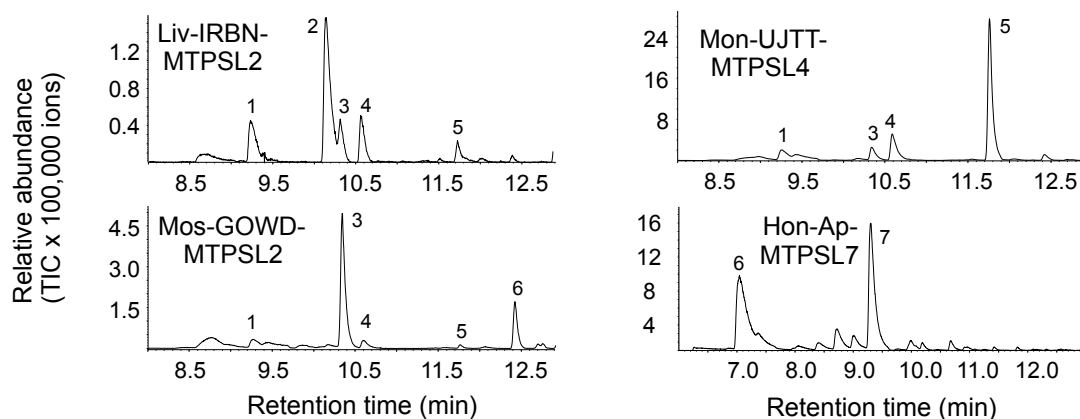

## B Diterpene synthase activity

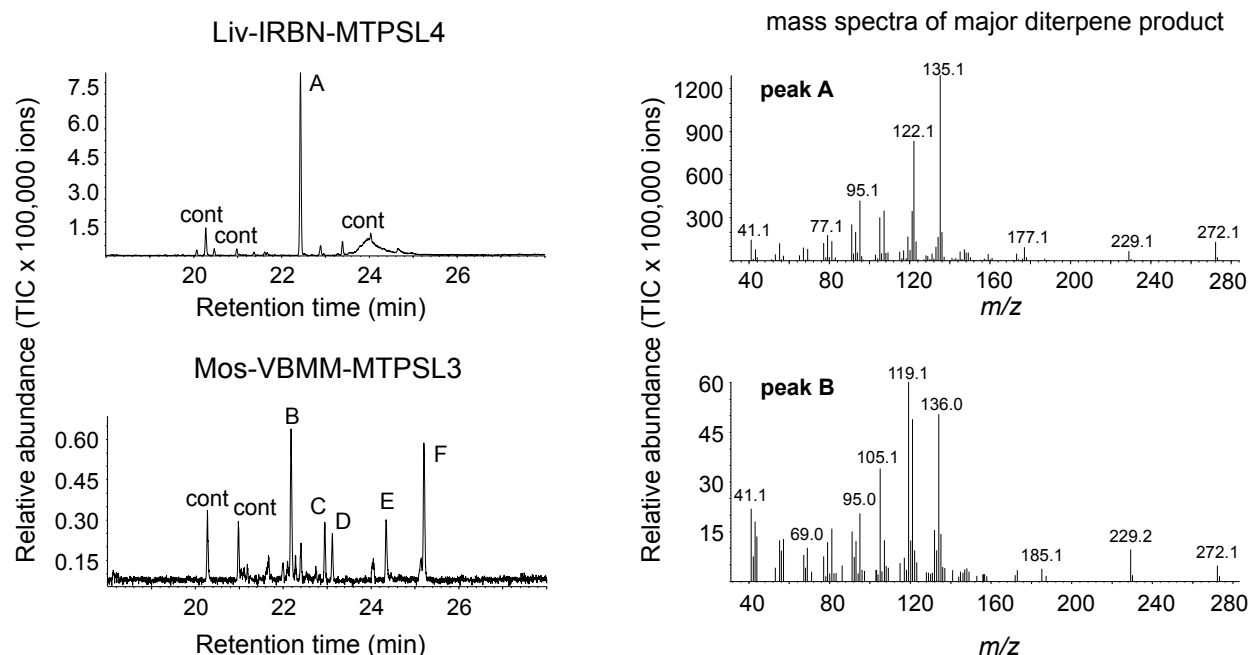

**Fig. S4. Monoterpene synthase and diterpene synthase activities of MTPSLs.** *MTPSL* genes were heterologously expressed in *Escherichia coli* and crude protein extracts were incubated with the potential substrates GPP (A) and GGPP (B), respectively. Monoterpene products were collected using solid-phase micro-extraction and diterpene products were extracted with hexane. Products were analyzed using gas chromatography/mass spectrometry. 1, myrcene\*; 2, limonene\*; 3, (*Z*)- $\beta$ -ocimene; 4, (*E*)- $\beta$ -ocimene\*; 5, linalool\*; 6, allo-ocimene; 6,  $\alpha$ -pinene; 7,  $\beta$ -phellandrene. A-F, unidentified diterpenes. Compounds marked with an asterisk (\*) were identified using authentic standards.

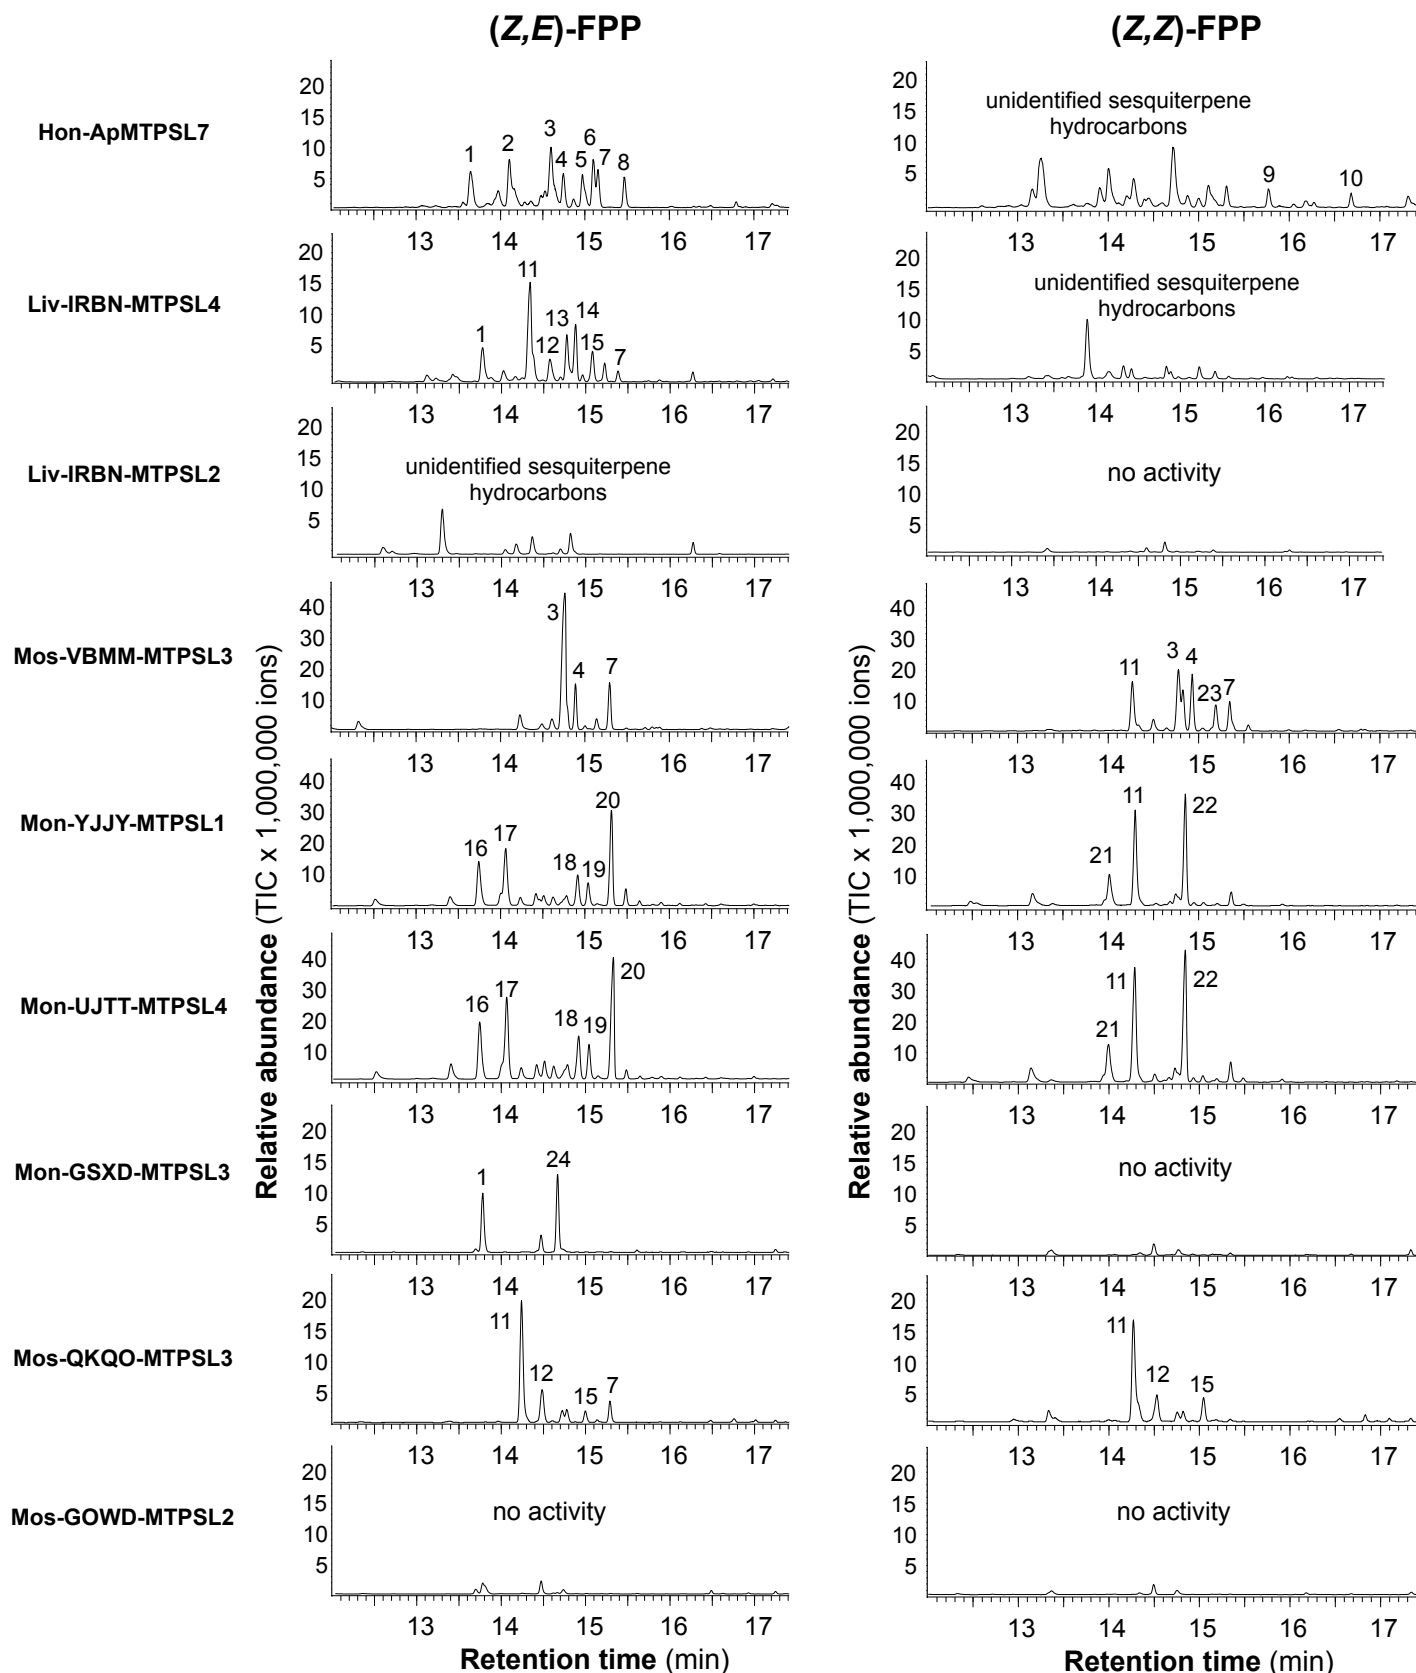

**Fig. S5. Sesquiterpene synthase activity of representative MTPSLs with (Z,E)-FPP and (Z,Z)-FPP.** MTPSL genes were heterologously expressed in *Escherichia coli* and crude protein extracts were incubated with the potential substrates (Z,E)-FPP and (Z,Z)-FPP. Enzyme products were collected using solid-phase micro-extraction and analyzed with gas chromatography/mass spectrometry. 1, (*E*)- $\beta$ -farnesene; 2,  $\beta$ -acoradiene; 3,  $\beta$ -bisabolene; 4, (*Z*)- $\gamma$ -bisabolene; 5, unidentified ST; 6, unidentified ST; 7, (*Z*)- $\alpha$ -bisabolene; 8, nerolidol; 9, unidentified oxygenated ST; 10, unidentified oxygenated ST; 11,  $\gamma$ -curcumene; 12, zingiberene; 13, unidentified ST; 14, unidentified ST; 15,  $\beta$ -sesquiphellandrene; 16, unidentified ST; 17, *epi*-bicyclosesquiphellandrene; 18,  $\gamma$ -cadinene; 19,  $\delta$ -cadinene; 20,  $\alpha$ -cadinene; 21, unidentified ST; 22, unidentified ST; 23, (*E*)- $\gamma$ -bisabolene; 24, (*E,E*)- $\alpha$ -farnesene. ST, sesquiterpene.
